# Supplementary material for: Complex Patient Perspectives on Evolving Diverticulitis Treatment
Source: bioRxiv or medRxiv preprint supplement (doi:10.1101/2023.06.26.23291565), 2023-06-27
Supplement: Supplementary file [file media-2.pdf]

# Diverticulitis Eligibility Survey

**Thanks for your interest in our study! Please answer the questions below to confirm that you are eligible to participate. If you provide an answer that indicates you are not eligible, a message will appear that the survey has ended.**

- 1) Have you ever been diagnosed with diverticulitis?  Yes  
 No

---

- 2) Have you ever been diagnosed with colon cancer or rectal cancer?  Yes  
 No

---

- 3) Have you ever been diagnosed with Inflammatory Bowel Disease, including Crohn's Disease or Ulcerative Colitis?  Yes  
 No

---

- 4) Have you ever had a surgery to remove part or all of your colon or rectum?  Yes  
 No

---

- 5) I certify that I am at least 18 years old and that I give my consent to participate in this study.  I consent  
 I do not consent

# Participant Demographic Info

Please complete the questions below to tell us more about yourself.

Thank you!

---

Age

\_\_\_\_\_

---

Ethnicity

Hispanic or Latino    NOT Hispanic or Latino    Unknown / Not Reported

---

Race

- American Indian/Alaska Native  
 Asian  
 Native Hawaiian or Other Pacific Islander  
 Black or African American  
 White  
 More Than One Race  
 Unknown / Not Reported

---

Gender

- Female  
 Male  
 Other  
 Prefer not to say

---

Where did you hear about our study?

- ResearchMatch  
 MyHealth at Vanderbilt message  
 Facebook  
 Twitter  
 Reddit  
 Other

---

Have you ever been hospitalized for diverticulitis?

- Yes  
 No

---

If yes, about how many times have you been hospitalized for diverticulitis?

\_\_\_\_\_

---

About how many episodes of diverticulitis have you had?

\_\_\_\_\_

---

About how long ago were you diagnosed with diverticulitis?

- Less than 1 year ago  
 1-5 years ago  
 5-10 years ago  
 10-20 years ago  
 Over 20 years ago

---

Does an immediate family member (parent, sibling, aunt/uncle, cousin) suffer from diverticulitis? If so, please list their relationship to you.

\_\_\_\_\_

# Diverticulitis Questions

Please complete the survey below about your experience with diverticulitis.

Thank you!

**We are planning a study to see whether antibiotics are necessary to treat diverticulitis. In this study, people who came to the emergency department with an episode or diverticulitis flare would either take antibiotics or a placebo ("sugar pill") without knowing which one they are taking. These are both safe options and people would only be in the study if their doctors agreed that it was safe for them. Before we do this study, we want to hear from patients with diverticulitis. We want to hear about your experiences and thoughts about participating in a study like this. Completing this survey does not require you to participate in the later study.**

Would you be willing to participate in a study where you are assigned to take either antibiotics or a placebo?  Yes  No

Please explain your answer (optional):

\_\_\_\_\_

On a scale of 1-10, how confident are you that antibiotics are needed to treat diverticulitis? (1 means you do NOT think they are necessary, and 10 means you are certain that they are necessary)

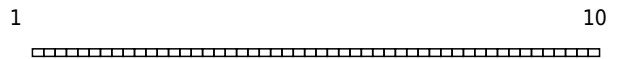

(Place a mark on the scale above)

**Below are reasons that someone might want to participate. Please rank them in order of most to least important to you. Rank the most important one #1 and the least important one #5.**

|                                                                                | 1- most important     | 2                     | 3                     | 4                     | 5 - least important   |
|--------------------------------------------------------------------------------|-----------------------|-----------------------|-----------------------|-----------------------|-----------------------|
| Getting paid money or a gift card                                              | <input type="radio"/> | <input type="radio"/> | <input type="radio"/> | <input type="radio"/> | <input type="radio"/> |
| Avoiding side effects* from antibiotics                                        | <input type="radio"/> | <input type="radio"/> | <input type="radio"/> | <input type="radio"/> | <input type="radio"/> |
| Having close follow-up with my doctor                                          | <input type="radio"/> | <input type="radio"/> | <input type="radio"/> | <input type="radio"/> | <input type="radio"/> |
| Helping reduce the rates of antibiotic resistance** for the good of the public | <input type="radio"/> | <input type="radio"/> | <input type="radio"/> | <input type="radio"/> | <input type="radio"/> |
| Helping make guidelines*** for treatment better                                | <input type="radio"/> | <input type="radio"/> | <input type="radio"/> | <input type="radio"/> | <input type="radio"/> |

\* The most common side effects of antibiotics used to treat diverticulitis are nausea, vomiting, diarrhea, abdominal pain, and rash. Rare but more serious side effects include C. diff infection, confusion, and seizures.

\*\* When doctors give antibiotics too much, they don't work as well. This is called "antibiotic resistance." It's important for doctors to only give you antibiotics when they are necessary.

\*\*\* Guidelines are recommendations by experts based on experiences with patients and research. Doctors use guidelines to help them make decisions about treatment.

What might increase your willingness to participate in a study like this?

---

**Please rank the following in order of what is most to least important to you for making decisions about your healthcare. Rank the most important one #1 and the least important one #5:**

|                                                              | 1 - most important    | 2                     | 3                     | 4                     | 5 - least important   |
|--------------------------------------------------------------|-----------------------|-----------------------|-----------------------|-----------------------|-----------------------|
| What my doctor thinks                                        | <input type="radio"/> | <input type="radio"/> | <input type="radio"/> | <input type="radio"/> | <input type="radio"/> |
| What the doctor seeing me in the Emergency Department thinks | <input type="radio"/> | <input type="radio"/> | <input type="radio"/> | <input type="radio"/> | <input type="radio"/> |
| What I read online                                           | <input type="radio"/> | <input type="radio"/> | <input type="radio"/> | <input type="radio"/> | <input type="radio"/> |
| What I've experienced in the past                            | <input type="radio"/> | <input type="radio"/> | <input type="radio"/> | <input type="radio"/> | <input type="radio"/> |
| What I've learned from friends/family members                | <input type="radio"/> | <input type="radio"/> | <input type="radio"/> | <input type="radio"/> | <input type="radio"/> |

**Below are factors you might be concerned about or afraid of when you have diverticulitis. Please rank them in order, with the most concerning/fearsome one #1 and the least concerning/fearsome one #5:**

|                                    | 1 - most concerning   | 2                     | 3                     | 4                     | 5 - least concerning  |
|------------------------------------|-----------------------|-----------------------|-----------------------|-----------------------|-----------------------|
| Being admitted to the hospital     | <input type="radio"/> | <input type="radio"/> | <input type="radio"/> | <input type="radio"/> | <input type="radio"/> |
| Needing treatment with antibiotics | <input type="radio"/> | <input type="radio"/> | <input type="radio"/> | <input type="radio"/> | <input type="radio"/> |
| Needing an ostomy bag              | <input type="radio"/> | <input type="radio"/> | <input type="radio"/> | <input type="radio"/> | <input type="radio"/> |
| Needing emergency surgery          | <input type="radio"/> | <input type="radio"/> | <input type="radio"/> | <input type="radio"/> | <input type="radio"/> |
| Going to the Emergency Department  | <input type="radio"/> | <input type="radio"/> | <input type="radio"/> | <input type="radio"/> | <input type="radio"/> |

What else are you concerned about or afraid of when you have diverticulitis?

---

# Participant Updater Module.

---

MRN \_\_\_\_\_

---

Study Status \_\_\_\_\_

---

First Name \_\_\_\_\_

---

Last Name \_\_\_\_\_

---

DOB \_\_\_\_\_

---

Email \_\_\_\_\_
